# Supplementary material for: Cooking, Digestion, and In Vitro Colonic Fermentation of Nigerian Wholegrains Affect Phenolic Acid Metabolism and Gut Microbiota Composition
Source: MDPI journal article supplement (doi:10.3390/ijms241814111), 2023-09-14
Supplement: s1 [file s1]

Supplementary Table S2: Calibration curve parameters for all phenolic acids, Limit of Detection (LOD) and Limit of Quantification (LOQ).

| Compound name                          | Conc. range<br>(µg/ml) | eq. slope | R <sup>2</sup> value | LOD (ng/ml) | LOQ (ng/ml) |
|----------------------------------------|------------------------|-----------|----------------------|-------------|-------------|
| Vanillic acid                          | 0.05 - 100             | 2106.4    | 0.9977               | 0.07        | 0.24        |
| Isovanillic acid                       | 0.05 - 100             | 9236.9    | 0.9974               | 42.58       | 141.94      |
| 4-hydroxybenzaldehyde                  | 0.05 - 100             | 2742.8    | 0.9966               | 2.43        | 8.09        |
| 3-hydroxybenzaldehyde                  | 0.05 - 100             | 304.88    | 0.995                | 120.49      | 401.62      |
| 4-hydroxybenzoic acid                  | 0.05 - 100             | 3807.9    | 0.9987               | 63.08       | 210.28      |
| 3-hydroxybenzoic acid                  | 0.05 - 100             | 667.46    | 0.9642               | 23          | 76.6        |
| Salicylic acid                         | 0.05 - 100             | 9573.8    | 0.9974               | 2.24        | 7.46        |
| 4-hydroxyphenylacetic acid             | 0.05 - 100             | 1832.5    | 0.9967               | 23.66       | 78.88       |
| 3-hydroxyphenylacetic acid             | 0.05 - 100             | 9790.9    | 0.9984               | 1.79        | 5.96        |
| 2-hydroxyphenylacetic acid             | 0.05 - 100             | 9790.8    | 0.9984               | 4.65        | 15.51       |
| Vanillin                               | 0.05 - 100             | 1032      | 0.9954               | 662         | 2209        |
| 3,4 // 3,5 -dihydroxy benzoic acid sum | 0.05 - 100             | 6022.5    | 0.9977               | 3.86        | 12.88       |
| 2,5-Dihydroxybenzoic acid              | 0.05 - 100             | 3521.3    | 0.9997               | 5.09        | 16.96       |
| 2,4-Dihydroxybenzoic acid              | 0.05 - 100             | 2757.6    | 0.9998               | 27.04       | 90.14       |
| Gallic acid                            | 0.05 - 100             | 2244.8    | 0.9958               | 7.06        | 23.53       |
| Homovanillic acid                      | 0.05 - 100             | 44.597    | 0.9973               | 755.73      | 2519.09     |
| Syringic acid                          | 0.05 - 100             | 54.869    | 0.9949               | 2.02        | 6.72        |
| p-Coumaric acid                        | 0.05 - 100             | 12192     | 0.997                | 3.02        | 10.05       |

|                     |            |        |        |        |         |
|---------------------|------------|--------|--------|--------|---------|
| Caffeic acid        | 0.05 - 100 | 7290.1 | 0.9972 | 9.43   | 31.44   |
| Dihydrocaffeic acid | 0.05 - 100 | 623.65 | 0.9949 | 1.62   | 5.4     |
| Ferulic acid        | 0.05 - 100 | 993.63 | 0.9997 | 0.16   | 0.52    |
| Isoferulic acid     | 0.05 - 100 | 73.939 | 0.9961 | 542.28 | 1807.59 |
| Hydroferulic acid   | 0.05 - 100 | 1103.7 | 0.9999 | 40.81  | 136.03  |
| Sinapic acid        | 0.05 - 100 | 1154.3 | 0.9999 | 0.11   | 0.37    |
| Hippuric acid       | 0.05 - 100 | 2206.9 | 0.9955 | 5.15   | 17.15   |
| Syringaldehyde      | 0.05 - 100 | 606.35 | 0.9944 | 479.25 | 1597.52 |

---
