# Supplementary material for: Cooking, Digestion, and In Vitro Colonic Fermentation of Nigerian Wholegrains Affect Phenolic Acid Metabolism and Gut Microbiota Composition
Source: MDPI journal article supplement (doi:10.3390/ijms241814111), 2023-09-14
Supplement: s1 [file s1]

Supplementary Table S1: LC-MS detection parameters of phenolic acids.

| Phenolic acids                         | Ion mode | MW    | Parent ion (m/z) | Fragments (m/z)    | CV (V) | CE (V)        | Cap(kV) |
|----------------------------------------|----------|-------|------------------|--------------------|--------|---------------|---------|
| Vanillic acid                          | +        | 168.2 | 169              | 151,123*,108       | 30     | 12, 13, 16    | 2.4     |
| Isovanillic acid                       | +        | 168.2 | 169.5            | 151,123*,108       | 30     | 12, 13, 16    | 2.4     |
| 4-hydroxybenzaldehyde                  | -        | 122.1 | 121.1            | 92*                | 25     | 20            | 2.4     |
| 3-hydroxybenzaldehyde                  | -        | 122.1 | 121.1            | 92*                | 25     | 17            | 2.4     |
| 4-hydroxybenzoic acid                  | -        | 138.1 | 137.1            | 108, 93*, 65       | 25     | 23,10,21      | 2.4     |
| 3-hydroxybenzoic acid                  | -        | 138.1 | 137.1            | 108, 93*, 65       | 25     | 23,10,21      | 2.4     |
| Salicylic acid                         | -        | 138.1 | 137.1            | 93*, 65, 75        | 25     | 23,23,25      | 2.4     |
| 4-hydroxyphenylacetic acid             | -        | 152.2 | 151.1            | 136, 107*, 92      | 25     | 12,10,19      | 2.4     |
| 3-hydroxyphenylacetic acid             | -        | 152.2 | 151.2            | 136, 107*, 92      | 25     | 12,10,19      | 2.4     |
| 2-hydroxyphenylacetic acid             | -        | 152.2 | 151.2            | 136, 107*, 92      | 25     | 12,10,19      | 2.4     |
| Vanillin                               | -        | 152.1 | 151.1            | 136*, 107, 92      | 25     | 12,10,19      | 2.4     |
| 3,4 // 3,5 -dihydroxy benzoic acid sum | -        | 154.1 | 153.1            | 109*, 67, 65       | 25     | 10,16, 12     | 2.4     |
| 2,5-Dihydroxybenzoic acid              | -        | 154.1 | 153.1            | 109*, 67, 65       | 25     | 10,16, 12     | 2.4     |
| 2,4-Dihydroxybenzoic acid              | -        | 154.1 | 153.1            | 109*, 67, 65       | 25     | 10,16, 12     | 2.4     |
| Gallic acid                            | -        | 170.1 | 169.1            | 151, 125*, 79      | 25     | 13,13,20      | 2.4     |
| Homovanillic acid                      | -        | 182.2 | 181.7            | 137*, 121, 109, 59 | 25     | 10, 16, 17,17 | 2.4     |
| Syringic acid                          | -        | 198.2 | 197.2            | 182*, 167, 121     | 25     | 13,17,20      | 2.4     |

|                     |   |       |       |                    |    |               |     |
|---------------------|---|-------|-------|--------------------|----|---------------|-----|
| p-Coumaric acid     | - | 164.2 | 163.2 | 119*, 117, 93, 91  | 25 | 13,22,27,20   | 2.4 |
| Caffeic acid        | - | 180.2 | 179.2 | 135* ,107,79       | 25 | 15,25,23      | 2.4 |
| Dihydrocaffeic acid | - | 182.2 | 181.2 | 137, 121, 109 ,59* | 25 | 10, 16, 17,17 | 2.4 |
| Ferulic acid        | - | 194.2 | 193.2 | 178*,149,134,103   | 25 | 10,15,15,10   | 2.4 |
| Isoferulic acid     | - | 194.2 | 193.2 | 178*,149,134,103   | 25 | 10,15,15,10   | 2.4 |
| Hydroferulic acid   | - | 196.2 | 195.2 | 136*, 121, 119     | 25 | 15, 26,17     | 2.4 |
| Sinapic acid        | - | 224.2 | 223.2 | 208*, 164, 149,120 | 25 | 12, 15, 19,27 | 2.4 |
| Hippuric acid       | - | 179.2 | 178.2 | 134*, 77, 56       | 25 | 11, 14, 15    | 2.4 |
| Syringaldehyde      | - | 182.2 | 181.2 | 166, 151* ,123     | 25 | 12, 18,25     | 2.4 |

---
